# Supplementary material for: A novel route for preparing graphitic ordered mesoporous carbon as electrochemical energy storage material
Source: Royal Society of Chemistry journal article supplement (doi:10.1039/c3ra40677f), 2013-01-01
Supplement: c3ra40677f.pdf [file c3ra40677f.pdf]

**A novel route for preparing graphitic ordered mesoporous carbon as  
electrochemical energy storage material**

*Dingsheng Yuan\**, Fulong Zeng, Jin Yan, Xiaoli Yuan, Xiangjin Huang, Wujun Zou

Department of Chemistry and Institute of Nanochemistry, Jinan University, Guangzhou,

510632, PR China

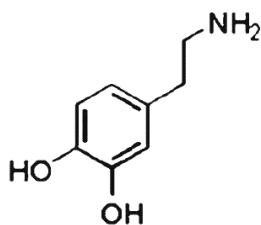

Fig.S1 the molecule structure of dopamine.

In the same experimental procedure, the different samples were also prepared by using the different catalyst contents at the different carbonization temperature. First, the effect of the graphitic degree on the carbonization temperature was performed by using 1.0 g MNi at 700, 800 and 900 °C. The carbon samples were labelled as GOMC-700, GOMC-800 and GOMC-900. Compared with GOMC-900, the (002) peak of OGMC-700 and OGMC-800 becomes lower and the other diffraction peaks were not presented, indicating that 900 °C was a suitable temperature for the preparation of the graphitized carbon as shown in Fig. S2a. Secondly, the different catalyst contents were carried out at 900 °C. When catalyst content was less than 0.5 g catalyst, the yield of GOMCs was very low. The compared XRD patterns of GOMCs

from 0.5 g and 1.0 g MNi were shown in Fig. S2b. GOMC-1 has higher graphitic degree. However, some disordered porous carbon in GOMC-1 could be observed by TEM images in Fig. S2c and d.

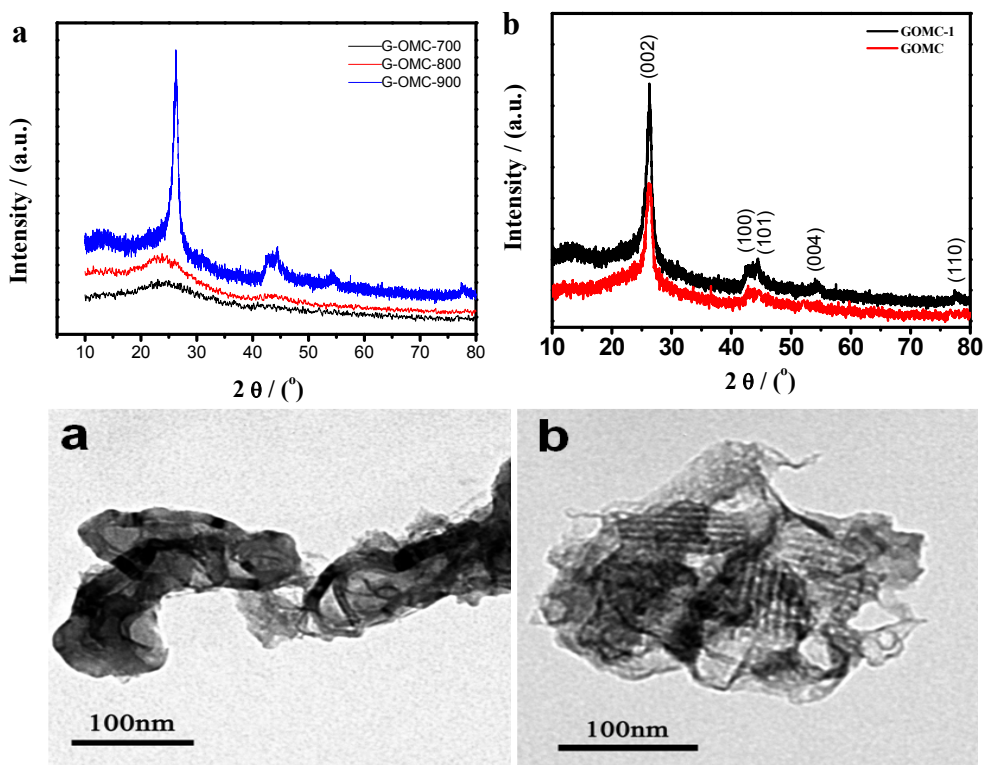

**Fig. S2-** XRD patterns of the G-OMCs obtained at different temperatures (a) and catalyst contents (b). TEM images of disordered structure (c) and ordered structure (d) of GOMC-1.

The electrochemical performance GOMC-1 was also studied, as shown in Fig. S3, but the specific capacitance is not satisfactory because of the higher graphitization to result in the ordered structure destroyed.

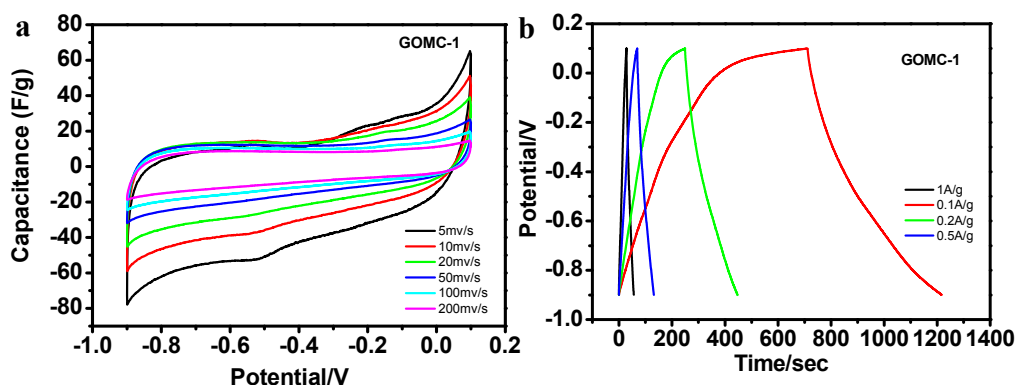

**Fig. S3-** Cyclic voltammograms of (a) GOMC-1 at different scan rates in 6 mol / L KOH electrolyte. Galvanostatic charge/discharge curves of (b) GOMC-1 at different current densities.

**Table S1** Specific capacitances of GOMC and GOMC-1 obtained by Galvanostatic charge-discharge measurements.

| Current densities |             | 0.1 A/g | 0.2 A/g | 0.5 A/g | 1 A/g |
|-------------------|-------------|---------|---------|---------|-------|
| G-OMC-1           | $C_g$ (F/g) | 51      | 40      | 32      | 29    |
| GOMC              | $C_g$ (F/g) | 183     | 109     | 91      | 84    |

### The preparation of CMK-3D

The ordered mesoporous carbon (CMK-3D) was prepared by replication using SBA-15 as template and dopamine as carbon source. Typically, 1.0 g of SBA-15 was impregnated with an aqueous solution obtained by dissolving 1.25 g of dopamine and 0.14 g of  $H_2SO_4$  in 5.0 g of deionized water. The mixture was then dried at 100 °C for 6 h, and subsequently at 160 °C for 6 h. In order to obtain fully polymerized and carbonized dopamine inside the pores of the silica template, 0.8 g of dopamine, 0.09 g

of  $\text{H}_2\text{SO}_4$ , and 5 g of water were again added to the pretreated sample and the mixture was again subjected to the thermal treatment described above. The dopamine / silica composite was calcined at  $900^\circ\text{C}$  for 6 h under nitrogen atmosphere to complete the carbonization. The silica template was dissolved with 5 wt% hydrofluoric acid at room temperature. The resultant product was filtered, washed with deionized water and ethanol and dried. The porous structure parameters for CMK-3D include  $762\text{ m}^2/\text{g}$  of BET surface ( $S_{\text{BET}}$ ), 3.7 nm of average pore diameter ( $D$ ), 0.71 mL / g of volume ( $D$ ).

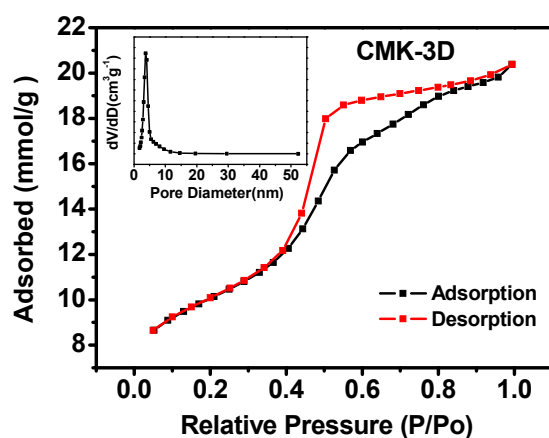

Fig.S4  $\text{N}_2$  adsorption-desorption isotherm and pore size distribution of CMK-3D.

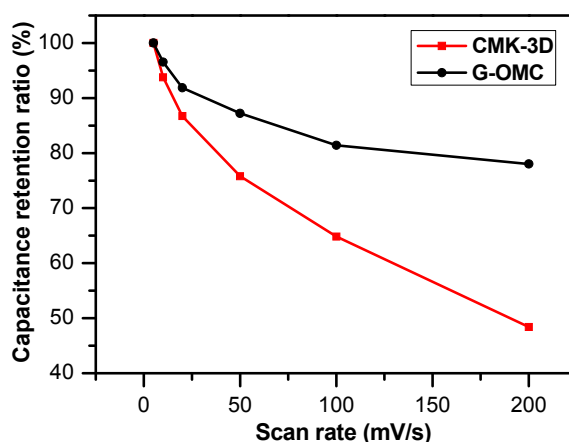

Fig.S5 Comparison for the capacitance retention of G-OMC and CMK-3D electrodes

at different scan rates.

**Table S2** Specific capacitances of G-OMC and CMK-3D obtained by 3-electrode cell measurements

| Current densities (A / g) |                                     | 0.1A/g | 0.2A/g | 0.5A/g | 1 A/g | 2 A/g | 5 A/g |
|---------------------------|-------------------------------------|--------|--------|--------|-------|-------|-------|
| GOMC                      | $C_g$ (F/g)                         | 183    | 109    | 91     | 84    | 80    | 75    |
|                           | $C_s$ ( $\mu\text{F}/\text{cm}^2$ ) | 68     | 41     | 34     | 31    | 30    | 28    |
| CMK-3D                    | $C_g$ (F/g)                         | 146    | 131    | 118    | 109   | 100   | 75    |
|                           | $C_s$ ( $\mu\text{F}/\text{cm}^2$ ) | 19     | 17     | 15     | 14    | 13    | 10    |

**Table S3** Specific capacitances of G-OMC obtained by 2-electrode cell measurements in 6.0 mol / L KOH and 1.0 mol / L LiClO<sub>4</sub> / EC / DMC electrolytes

| Current densities (A / g)    |                                                 | 0.1 | 0.2 | 0.5 | 1  | 2  | 5  |
|------------------------------|-------------------------------------------------|-----|-----|-----|----|----|----|
| Specific capacitance (F / g) | KOH (Potential: 1V)                             | 96  | 87  | 77  | 65 | 53 | 40 |
|                              | LiClO <sub>4</sub> /(EC+DMC) (Potential: 2.5 V) | 74  | 68  | 60  | 51 | 40 | 32 |
